# Supplementary material for: The genetic architecture of NAFLD among inbred strains of mice
Source: eLife journal article supplement (doi:10.7554/elife.05607), 2015-06-12
Supplement: supp [file elife-05607-supp-v1.zip]

**Supplementary File 2. Correlation of hepatic TG and plasma metabolites.**

| <b>Metabolite</b>           | <b>bicor</b> | <b>p value</b> |
|-----------------------------|--------------|----------------|
| 5-HIAA                      | -0.004       | 0.970          |
| 5'-adenosylhomocysteine     | 0.047        | 0.657          |
| ADMA/SDMA                   | 0.134        | 0.199          |
| alanine                     | 0.098        | 0.349          |
| allantoin                   | 0.105        | 0.315          |
| alpha-glycerophosphocholine | -0.112       | 0.284          |
| aminoisobutyric acid        | 0.056        | 0.594          |
| anthranilic acid            | 0.020        | 0.851          |
| arginine                    | -0.530       | 9.9E-12        |
| asparagine                  | 0.066        | 0.528          |
| aspartate                   | 0.059        | 0.574          |
| betaine                     | -0.010       | 0.923          |
| carnitine                   | 0.022        | 0.831          |
| choline                     | -0.028       | 0.791          |
| cis/trans hydroxyproline    | -0.018       | 0.863          |
| citrulline                  | 0.180        | 0.034          |
| creatine                    | 0.230        | 0.006          |
| creatinine                  | 0.250        | 0.003          |
| dimethylglycine             | 0.061        | 0.560          |
| GABA                        | -0.048       | 0.644          |
| glutamine                   | -0.104       | 0.320          |
| glycerol                    | 0.126        | 0.229          |
| glycine                     | 0.183        | 0.078          |
| histidine                   | 0.093        | 0.376          |
| isoleucine                  | -2.3E-04     | 0.998          |
| kynurenic acid              | 0.047        | 0.656          |
| leucine                     | 0.017        | 0.869          |
| lysine                      | 0.032        | 0.759          |
| methionine                  | 0.075        | 0.472          |
| N-carbomoyl-beta-alanine    | 0.044        | 0.678          |
| niacinamide                 | -0.009       | 0.930          |
| NMMA                        | 0.046        | 0.661          |
| ornithine                   | -0.180       | 0.027          |
| phenylalanine               | 0.060        | 0.567          |
| proline                     | 0.199        | 0.055          |
| serine                      | 0.199        | 0.055          |
| spermidine                  | 0.016        | 0.877          |
| taurine                     | 0.089        | 0.399          |
| thiamine                    | -0.244       | 0.018          |
| threonine                   | 0.157        | 0.132          |
| thyroxine                   | -0.067       | 0.525          |
| trimethylamine-N-oxide      | 0.180        | 0.034          |
| tryptophan                  | -0.095       | 0.365          |
| tyrosine                    | 0.019        | 0.857          |
| valine                      | 0.078        | 0.455          |
