# Supplementary material for: The genetic architecture of NAFLD among inbred strains of mice
Source: eLife. 2015 Jun 12;4:e05607. doi: 10.7554/eLife.05607 (PMC4493743; doi:10.7554/eLife.05607)
Supplement: Supplementary file 1. — Strain average of hepatic lipids. DOI: http://dx.doi.org/10.7554/eLife.05607.024 [file elife05607s001.xlsx]

## Sheet: Sheet1
Supplementary File 1. Strain average of hepatic lipids (mg/g liver) presented as mean ± S.D.
Strain	Triglyceride	Total Cholesterol	Unesterified Cholesterol	Phospholipid
129X1/SvJ	116.00 ± 22.21	4.40 ± 0.33	2.10 ± 0.12	14.05 ± 0.57
A/J	30.50 ± 7.37	3.60 ± 0.43	2.40 ± 0.37	15.75 ± 0.53
AKR/J	67.60 ± 21.48	3.80 ± 0.35	2.76 ± 0.26	16.86 ± 0.59
AXB10/PgnJ	44.25 ± 37.40	3.33 ± 0.43	2.75 ± 0.06	15.93 ± 1.42
AXB12/PgnJ	56.80 ± 13.39	3.24 ± 0.41	2.00 ± 0.24	13.60 ± 0.68
AXB13/PgnJ	89.20 ± 24.68	3.64 ± 0.43	1.88 ± 0.11	12.88 ± 0.54
AXB15/PgnJ	69.75 ± 43.65	3.58 ± 1.31	1.88 ± 0.19	15.85 ± 0.82
AXB19/PgnJ	95.00 ± 55.99	4.64 ± 1.04	2.70 ± 0.66	15.26 ± 1.68
AXB19a/PgnJ	51.00 ± 19.24	2.90 ± 0.42	2.05 ± 0.10	14.33 ± 1.17
AXB19b/PgnJ	39.40 ± 11.78	3.82 ± 0.58	3.00 ± 0.20	16.48 ± 0.75
AXB2/PgnJ	108.33 ± 35.30	5.07 ± 0.12	3.10 ± 0.10	17.50 ± 0.61
AXB5/PgnJ	199.00 ± 182.84	3.10 ± 1.36	1.85 ± 0.60	13.40 ± 1.55
AXB6/PgnJ	62.50 ± 10.61	3.65 ± 0.21	2.40 ± 0.00	15.15 ± 0.07
AXB8/PgnJ	84.00 ± 16.26	2.64 ± 0.17	1.86 ± 0.09	14.54 ± 1.03
BALB/cJ	41.50 ± 9.26	2.85 ± 0.25	2.08 ± 0.22	16.18 ± 2.03
BTBR T<+> tf/J	66.50 ± 10.63	5.25 ± 0.78	3.25 ± 0.13	19.43 ± 1.58
BUB/BnJ	52.60 ± 20.88	3.64 ± 0.48	2.58 ± 0.33	17.46 ± 2.55
BXA1/PgnJ	224.33 ± 43.55	5.60 ± 0.87	2.43 ± 0.31	14.40 ± 0.92
BXA11/PgnJ	166.75 ± 33.97	2.88 ± 0.38	1.65 ± 0.19	14.75 ± 0.99
BXA12/PgnJ	50.75 ± 8.22	3.08 ± 0.22	2.35 ± 0.10	16.05 ± 0.88
BXA13/PgnJ	11.67 ± 3.21	2.87 ± 0.42	2.43 ± 0.38	14.83 ± 0.93
BXA14/PgnJ	28.50 ± 10.66	4.90 ± 0.80	3.35 ± 0.13	16.68 ± 0.69
BXA16/PgnJ	81.67 ± 15.37	2.87 ± 0.23	2.03 ± 0.21	16.00 ± 0.95
BXA2/PgnJ	122.20 ± 36.09	4.16 ± 0.93	2.54 ± 0.46	14.12 ± 0.74
BXA24/PgnJ	111.75 ± 49.57	3.95 ± 0.38	2.65 ± 0.24	13.48 ± 0.67
BXA4/PgnJ	28.75 ± 7.27	3.50 ± 0.12	2.68 ± 0.10	19.00 ± 0.77
BXA7/PgnJ	52.67 ± 21.38	3.73 ± 0.45	2.40 ± 0.31	15.65 ± 1.53
BXA8/PgnJ	156.00 ± 30.77	3.50 ± 0.35	1.90 ± 0.12	13.00 ± 0.67
BXD1/TyJ	19.33 ± 2.31	2.77 ± 0.15	2.13 ± 0.12	13.57 ± 0.06
BXD11/TyJ	19.00 ± 1.41	2.90 ± 0.42	2.50 ± 0.42	17.60 ± 2.55
BXD12/TyJ	18.80 ± 4.38	2.80 ± 0.14	2.38 ± 0.15	14.36 ± 0.93
BXD13/TyJ	82.00 ± 39.60	3.95 ± 0.21	2.65 ± 0.21	15.25 ± 0.92
BXD14/TyJ	47.00 ± 27.93	2.73 ± 0.49	2.23 ± 0.45	13.88 ± 1.67
BXD15/TyJ	13.80 ± 6.26	3.46 ± 0.98	2.78 ± 0.81	15.08 ± 2.39
BXD16/TyJ	133.67 ± 22.03	4.57 ± 0.46	3.03 ± 0.21	14.27 ± 0.06
BXD19/TyJ	222.75 ± 73.63	3.78 ± 0.42	2.18 ± 0.26	14.90 ± 1.35
BXD20/TyJ	88.43 ± 58.56	3.16 ± 0.75	2.14 ± 0.49	15.33 ± 0.81
BXD21/TyJ	41.00 ± 6.71	3.10 ± 0.33	2.72 ± 0.30	16.46 ± 2.02
BXD24/TyJ-Cep290<rd16>/J	87.00 ± 56.84	2.45 ± 0.17	1.90 ± 0.12	17.08 ± 1.14
BXD31/TyJ	50.50 ± 0.71	2.75 ± 0.07	2.20 ± 0.00	14.60 ± 0.57
BXD32/TyJ	56.00 ± 11.29	3.24 ± 0.39	2.60 ± 0.24	16.06 ± 0.90
BXD34/TyJ	31.75 ± 9.60	2.95 ± 0.55	2.30 ± 0.48	15.45 ± 1.59
BXD36/TyJ	62.00 ± 8.91	3.65 ± 0.34	2.65 ± 0.29	16.33 ± 2.02
BXD38/TyJ	32.00 ± 10.00	2.80 ± 0.53	2.30 ± 0.46	15.63 ± 1.36
BXD39/TyJ	171.75 ± 39.61	4.20 ± 0.22	2.73 ± 0.17	14.40 ± 1.99
BXD40/TyJ	91.00 ± 28.93	3.25 ± 0.21	2.15 ± 0.10	13.70 ± 0.78
BXD43/RwwJ	73.50 ± 42.25	3.08 ± 0.17	2.50 ± 0.12	15.55 ± 0.58
BXD44/RwwJ	105.00 ± 35.98	2.90 ± 0.26	2.15 ± 0.30	15.40 ± 1.34
BXD45/RwwJ	44.80 ± 9.96	3.12 ± 0.18	2.20 ± 0.00	15.76 ± 0.79
BXD48/RwwJ	36.67 ± 15.01	2.87 ± 0.46	2.07 ± 0.31	14.40 ± 1.22
BXD49/RwwJ	157.75 ± 84.78	4.08 ± 0.50	2.40 ± 0.00	12.70 ± 0.45
BXD5/TyJ	68.50 ± 53.52	3.00 ± 0.16	2.33 ± 0.25	14.60 ± 1.26
BXD50/RwwJ	102.67 ± 39.26	2.73 ± 0.31	2.00 ± 0.20	13.47 ± 0.83
BXD51/RwwJ	72.75 ± 41.02	3.25 ± 0.10	2.35 ± 0.10	14.70 ± 0.22
BXD55/RwwJ	111.33 ± 69.87	2.87 ± 0.31	1.93 ± 0.23	13.93 ± 1.21
BXD56/RwwJ	60.67 ± 24.25	3.07 ± 0.63	2.48 ± 0.57	15.58 ± 3.04
BXD6/TyJ	48.80 ± 11.82	3.24 ± 0.33	2.78 ± 0.27	17.34 ± 1.44
BXD60/RwwJ	344.00 ± 35.36	7.05 ± 0.49	2.70 ± 0.14	11.75 ± 0.35
BXD61/RwwJ	182.50 ± 46.37	3.95 ± 0.34	2.10 ± 0.12	12.70 ± 1.61
BXD62/RwwJ	65.33 ± 21.86	3.20 ± 0.44	1.97 ± 0.20	14.30 ± 0.83
BXD64/RwwJ	95.00 ± 40.15	3.50 ± 0.26	2.20 ± 0.16	14.50 ± 1.31
BXD66/RwwJ	65.80 ± 16.28	3.36 ± 0.11	2.52 ± 0.11	15.20 ± 0.93
BXD68/RwwJ	73.50 ± 16.92	3.00 ± 0.28	2.30 ± 0.12	14.25 ± 1.00
BXD70/RwwJ	77.00 ± 31.85	3.40 ± 0.43	2.10 ± 0.26	13.05 ± 0.57
BXD71/RwwJ	88.25 ± 32.07	3.23 ± 0.17	2.43 ± 0.05	14.05 ± 0.47
BXD73/RwwJ	26.50 ± 13.50	2.80 ± 0.23	2.05 ± 0.10	13.80 ± 0.82
BXD74/RwwJ	39.50 ± 15.00	2.90 ± 0.12	2.10 ± 0.12	15.00 ± 0.85
BXD75/RwwJ	111.00 ± 60.19	3.50 ± 0.42	2.10 ± 0.12	13.95 ± 0.74
BXD79/RwwJ	78.50 ± 23.12	3.05 ± 0.34	2.05 ± 0.19	13.95 ± 1.17
BXD8/TyJ	44.50 ± 19.09	3.00 ± 0.00	2.60 ± 0.00	15.05 ± 0.92
BXD84/RwwJ	108.50 ± 39.81	3.15 ± 0.10	2.05 ± 0.19	13.05 ± 1.43
BXD85/RwwJ	113.00 ± 30.04	3.30 ± 0.26	2.20 ± 0.00	14.60 ± 0.37
BXD86/RwwJ	136.40 ± 58.74	3.16 ± 0.33	2.12 ± 0.18	13.56 ± 1.10
BXD87/RwwJ	22.67 ± 5.77	2.67 ± 0.12	2.07 ± 0.12	14.47 ± 0.76
BXD9/TyJ	184.00 ± 16.79	4.15 ± 0.57	2.75 ± 0.53	15.33 ± 1.43
BXH19/TyJ	34.60 ± 17.77	3.80 ± 0.76	2.76 ± 0.39	16.20 ± 0.90
BXH2/TyJ	10.00 ± 0.00	2.70 ± 0.10	2.20 ± 0.20	14.77 ± 0.60
BXH20/KccJ	32.00 ± 7.00	2.93 ± 0.21	2.50 ± 0.10	16.47 ± 0.32
BXH22/KccJ	154.50 ± 55.44	4.85 ± 0.86	2.40 ± 0.29	15.20 ± 1.35
BXH4/TyJ	133.50 ± 52.59	3.18 ± 0.35	2.00 ± 0.00	15.18 ± 1.02
BXH6/TyJ	62.60 ± 15.77	3.14 ± 0.31	2.12 ± 0.23	17.96 ± 1.42
BXH8/TyJ	108.00 ± 53.03	3.80 ± 0.40	2.00 ± 0.20	12.47 ± 0.81
BXH9/TyJ	60.50 ± 30.28	2.67 ± 0.33	2.12 ± 0.24	15.20 ± 1.34
C3H/HeJ	122.50 ± 22.49	4.63 ± 0.66	3.33 ± 0.25	20.30 ± 1.87
C57BL/6J	186.25 ± 31.32	3.20 ± 0.16	2.03 ± 0.05	14.35 ± 0.73
C57BLKS/J	34.75 ± 5.38	4.20 ± 0.34	3.28 ± 0.25	18.98 ± 0.48
C57L/J	114.00 ± 61.78	3.86 ± 0.61	2.28 ± 0.18	14.04 ± 0.81
C58/J	18.00 ± 10.95	3.75 ± 0.44	2.90 ± 0.35	15.78 ± 0.22
CBA/J	142.25 ± 31.61	3.30 ± 0.93	2.33 ± 0.73	15.60 ± 2.41
CE/J	82.00 ± 21.73	4.50 ± 0.62	2.40 ± 0.23	15.25 ± 1.47
CXB11/HiAJ	70.80 ± 19.89	3.64 ± 0.59	2.84 ± 0.36	16.44 ± 1.97
CXB12/HiAJ	53.80 ± 14.50	3.00 ± 0.33	2.34 ± 0.26	15.12 ± 0.90
CXB13/HiAJ	15.00 ± 5.52	3.62 ± 1.04	2.88 ± 0.72	16.04 ± 1.59
CXB3/ByJ	39.00 ± 11.40	3.14 ± 0.23	2.52 ± 0.30	16.26 ± 1.11
CXB4/ByJ	65.60 ± 23.70	2.98 ± 0.33	2.44 ± 0.36	15.28 ± 1.55
CXB6/ByJ	38.80 ± 13.24	3.60 ± 0.58	3.04 ± 0.43	18.12 ± 2.79
CXB7/ByJ	79.17 ± 17.17	3.38 ± 0.16	2.37 ± 0.20	14.85 ± 1.12
DBA/2J	58.75 ± 8.62	3.13 ± 0.46	2.58 ± 0.43	16.18 ± 1.82
FVB/NJ	34.40 ± 13.74	3.74 ± 0.32	2.92 ± 0.30	17.34 ± 1.98
I/LnJ	73.20 ± 27.30	2.92 ± 0.23	1.96 ± 0.09	15.84 ± 0.75
KK/HlJ	255.80 ± 77.55	5.98 ± 1.02	3.00 ± 0.46	13.94 ± 2.00
LG/J	99.25 ± 40.80	3.75 ± 0.19	2.40 ± 0.00	18.83 ± 0.54
MA/MyJ	101.50 ± 15.52	7.70 ± 1.56	3.13 ± 0.30	15.45 ± 0.73
NOD/ShiLtJ	39.50 ± 4.95	2.90 ± 0.14	2.20 ± 0.00	15.55 ± 0.07
NON/ShiLtJ	61.80 ± 28.92	3.50 ± 0.29	2.72 ± 0.22	15.80 ± 1.53
NZB/BlNJ	20.50 ± 6.81	3.40 ± 0.28	2.25 ± 0.10	14.85 ± 1.08
NZW/LacJ	72.00 ± NA	4.00 ± NA	1.80 ± NA	14.00 ± NA
PL/J	152.33 ± 44.26	4.72 ± 0.86	2.45 ± 0.50	17.17 ± 0.86
RIIIS/J	121.50 ± 23.56	3.10 ± 0.26	1.90 ± 0.26	15.23 ± 1.19
SEA/GnJ	23.50 ± 3.42	3.48 ± 0.15	2.73 ± 0.15	16.78 ± 0.81
SJL/J	26.20 ± 12.66	3.82 ± 0.29	3.12 ± 0.18	18.34 ± 0.89
SM/J	75.33 ± 10.07	3.33 ± 0.23	2.20 ± 0.00	15.87 ± 1.14
SWR/J	29.50 ± 12.87	4.03 ± 0.29	3.15 ± 0.26	18.03 ± 0.81
